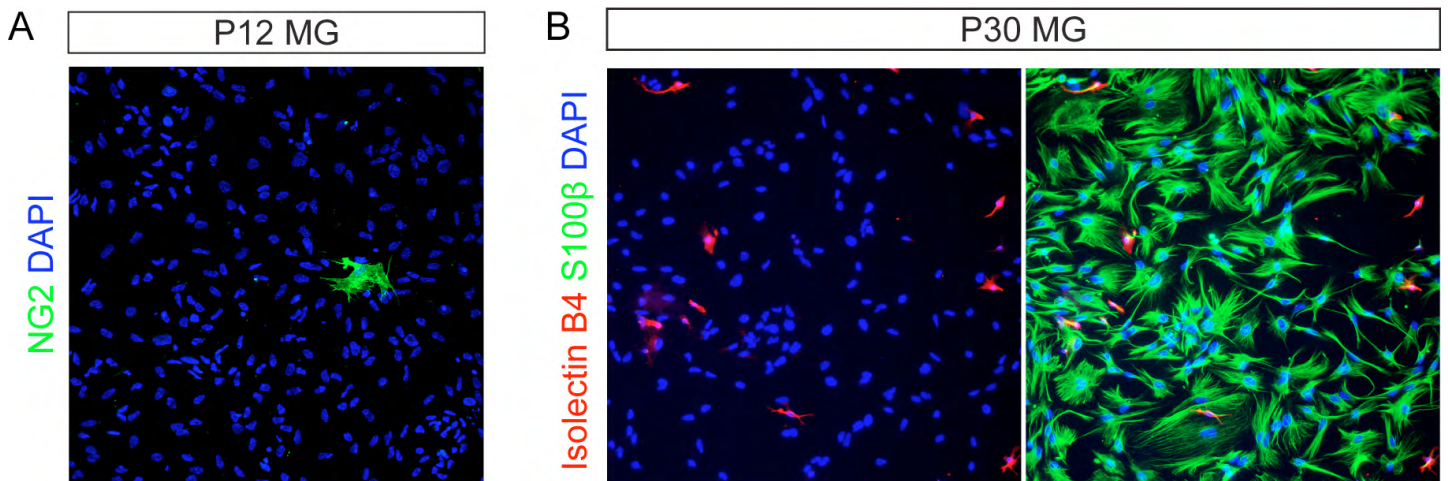

**Fig. S1. P12 and P30 MG cultures have low contamination of other cell types.** Related to Figs 1, 2. **(A)** Less than 1% of P12 MG labeled with the pericyte marker NG2 after 1 week in culture. **(B)** NMDA-damaged P30 retinas were dissociated 2 days after damage and cultured for one week. The majority of cells label with glial marker S100β, and few cells express the endothelial marker isolectin B4.

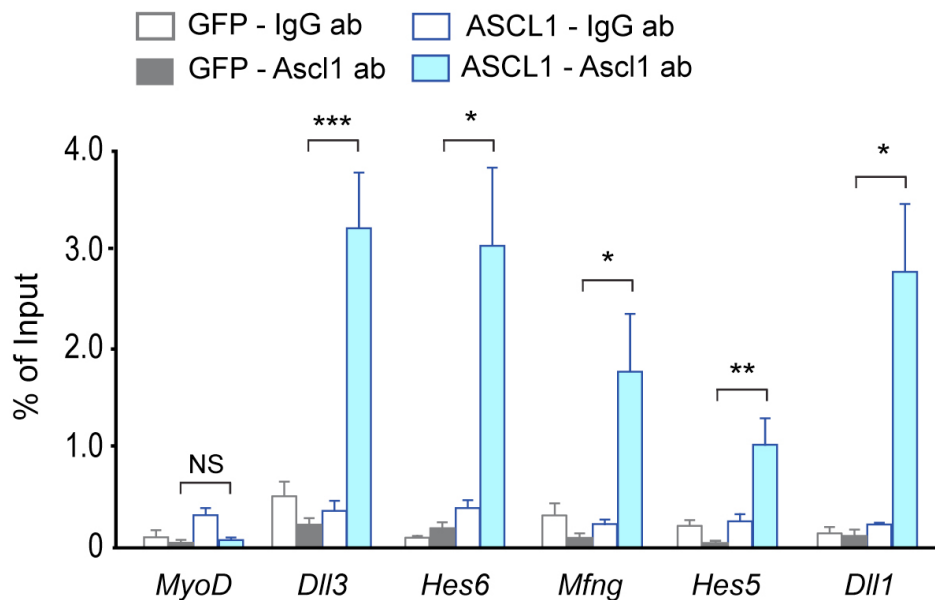

**Fig. S2. ASCL1 does not bind predicted targets in GFP-infected MG.** Related to Fig. 2. ChIP for Ascl1 or control IgG antibodies at the 5' promoter region of genes indicated. Significant enrichment of Ascl1 in ASCL1-infected P12 MG compared with GFP-infected P12 MG was observed. Data are mean  $\pm$  s.e.m. \* $P$ <0.05, \*\* $P$ <0.01, \*\*\* $P$ <0.001 by Student's  $t$ -test.

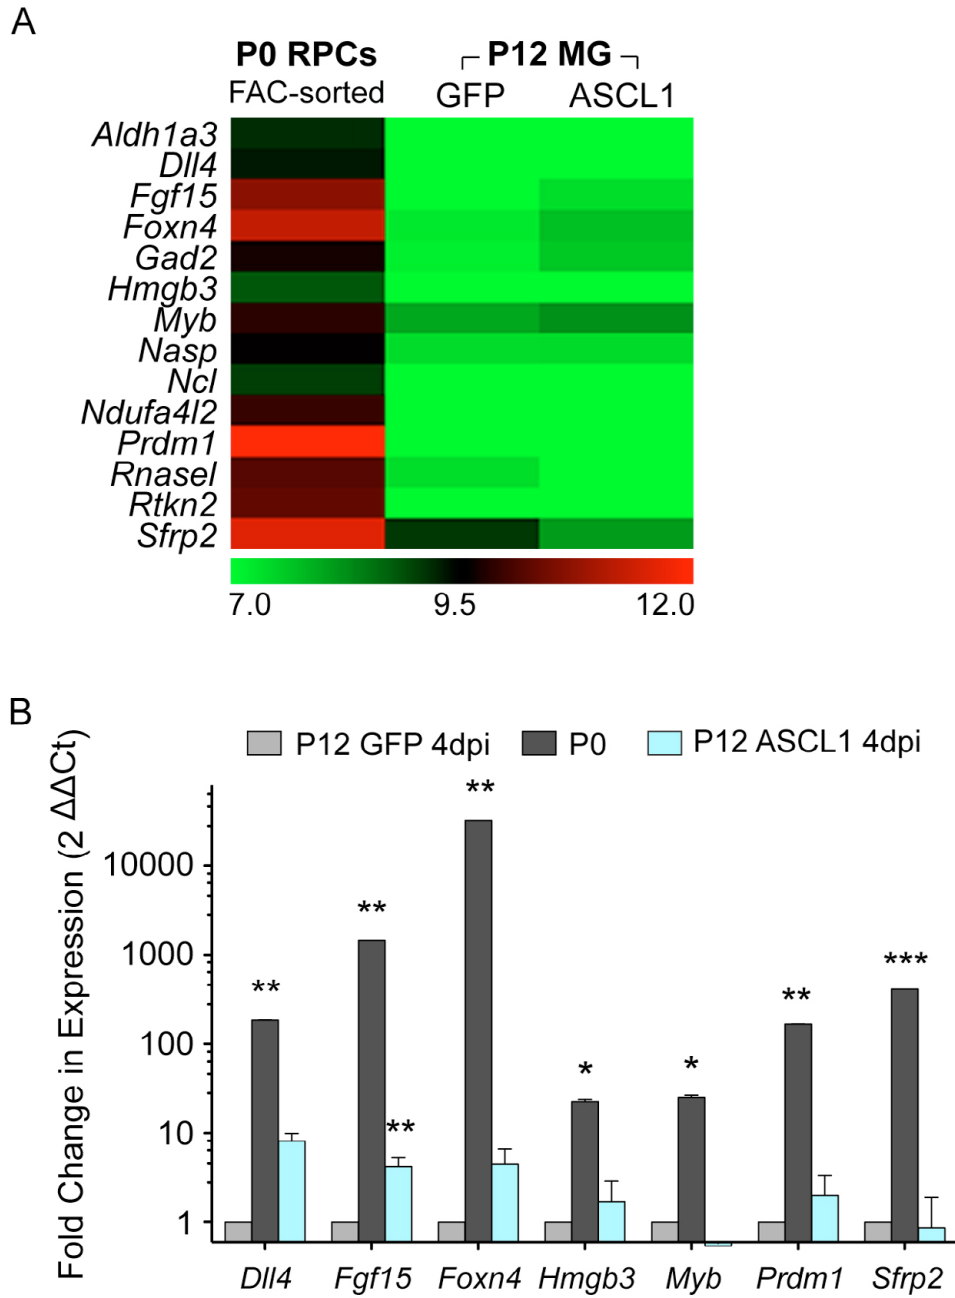

**Fig. S3. A subset of progenitor-specific genes are not reactivated in MG by ASCL1 alone.** Related to Fig. 2. **(A)** A subset of genes on microarray analysis at 4 dpi are highly expressed (log transformed normalized values) in P0 progenitors but do not upregulate after ASCL1 infection of MG. **(B)** Expression patterns were confirmed by qPCR. Data are mean  $\pm$  s.e.m. \* $P < 0.05$ , \*\* $P < 0.01$ , \*\*\* $P < 0.001$  by Student's *t*-test.

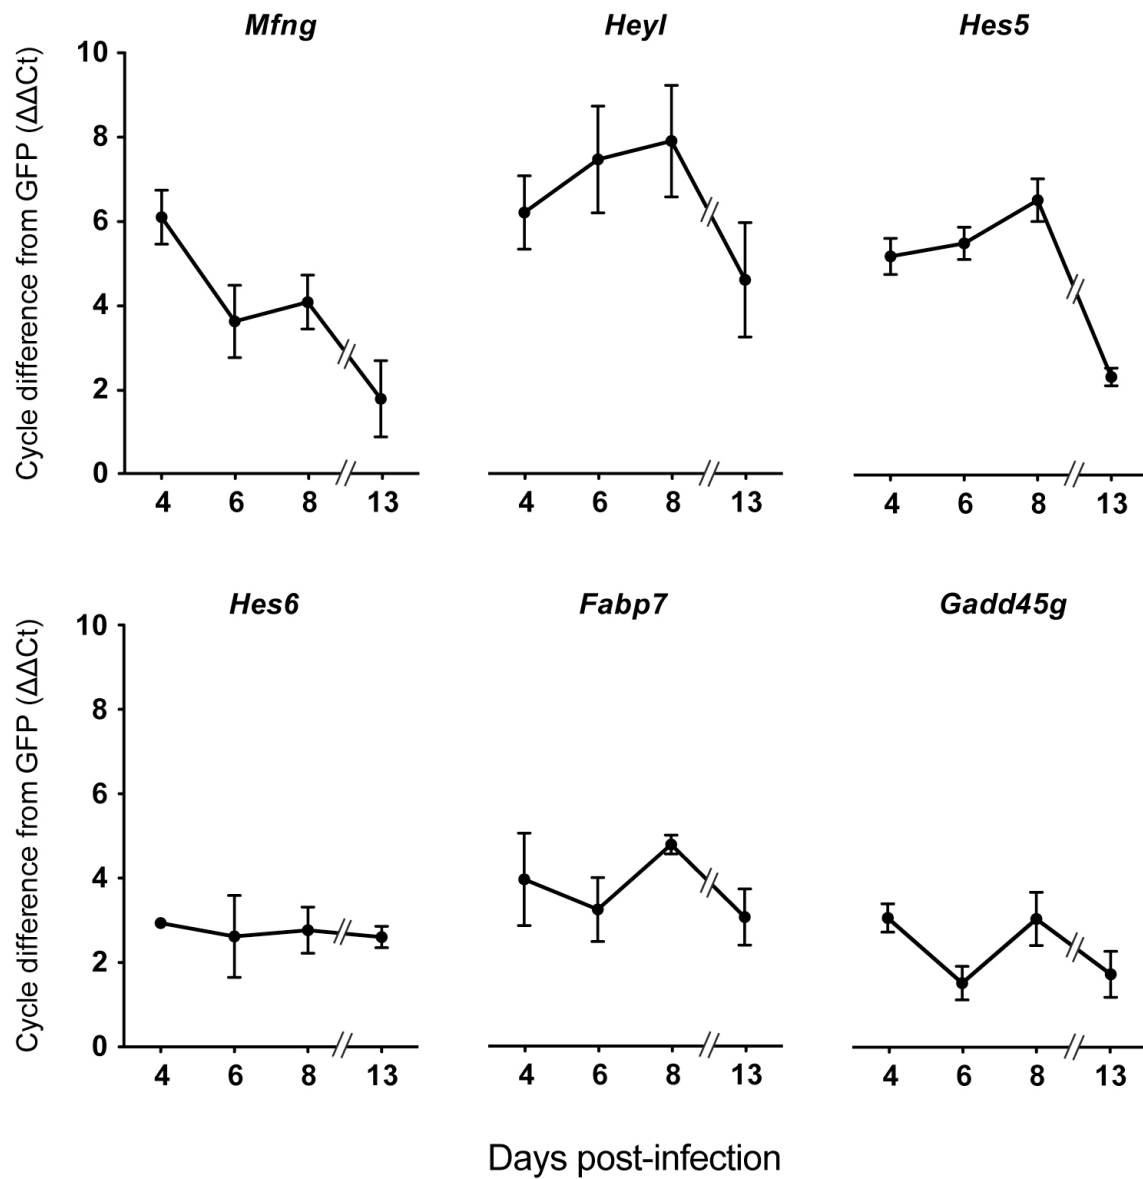

**Fig. S4. Timecourse of expression of retinal progenitor genes.** Related to Fig. 2. Progenitor genes are enriched in P12 ASCL1-infected MG at 4, 6 and 8 dpi compared with GFP-infected controls from paired data. By 13 dpi, *Mfng*, *Heyl* and *Hes5* are greatly decreased. Data are mean  $\pm$  s.e.m.

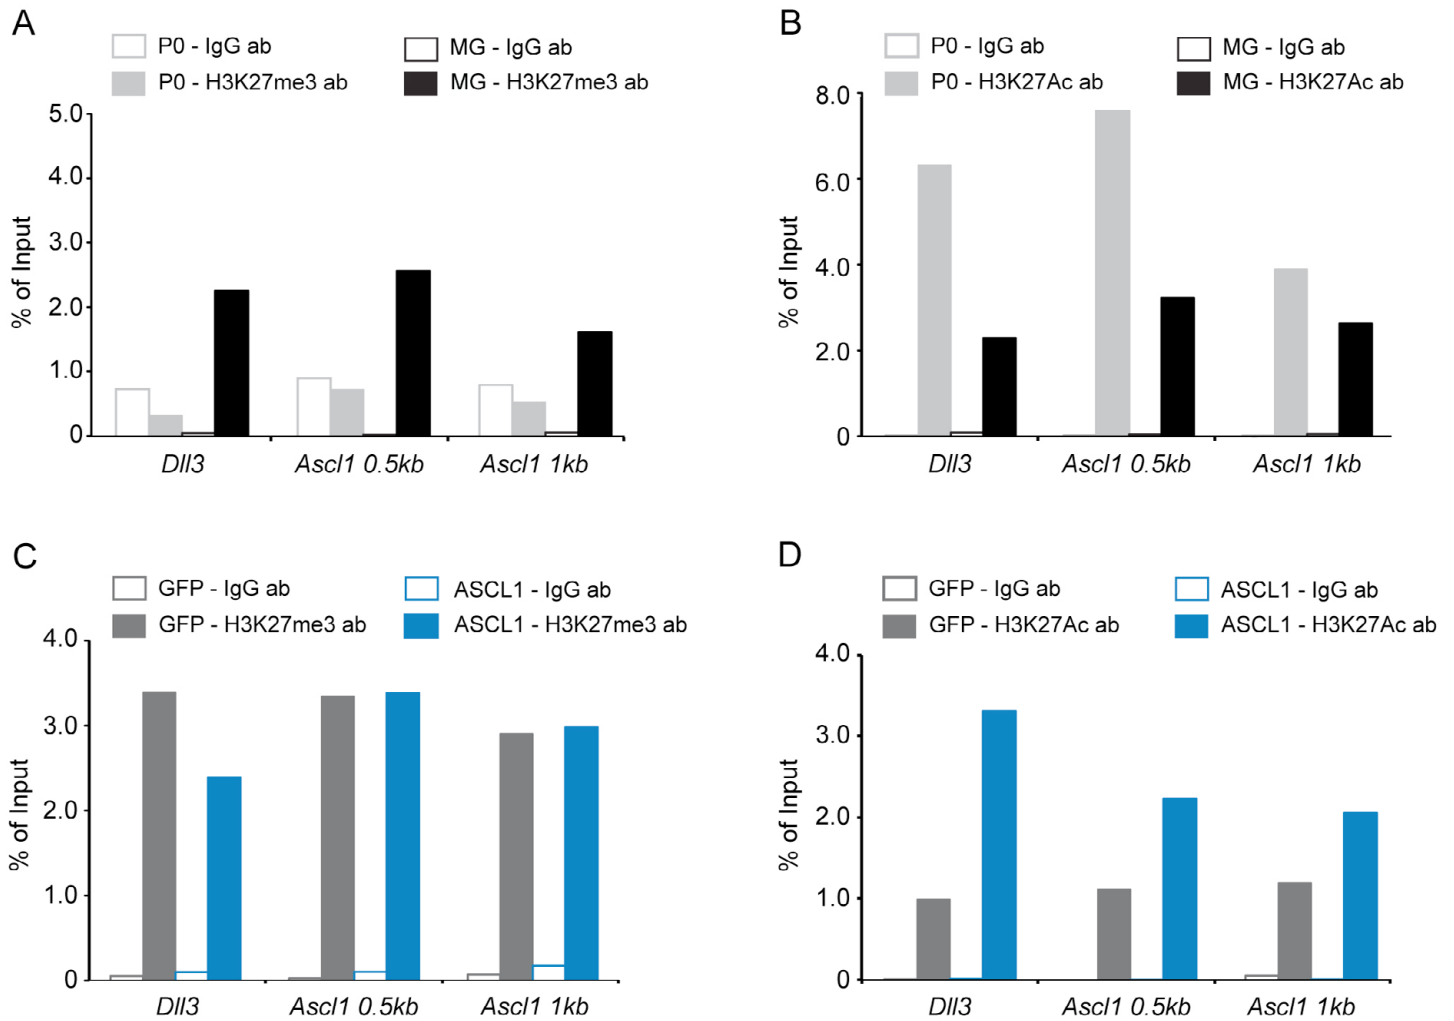

**Fig S5. The *Ascl1* promoter is repressed during MG development and partially remodeled by *ASCL1* expression.** Related to Fig. 5. ChIP for H3K27me3 or H3K27Ac versus IgG control antibodies at two locations in the *Ascl1* 5' promoter, 500 bp and 1 kb upstream of the transcription start site. *Dll3* is included as a control progenitor gene locus consistent with Fig. 5. (A,B) The *Ascl1* promoter shows an increase in tri-methylation (A) and a decrease in acetylation (B) between P0 progenitors and P12 MG. (C,D) *ASCL1* infection of MG at 4 dpi reverses the acetylation (D), but not the tri-methylation (C) trend.

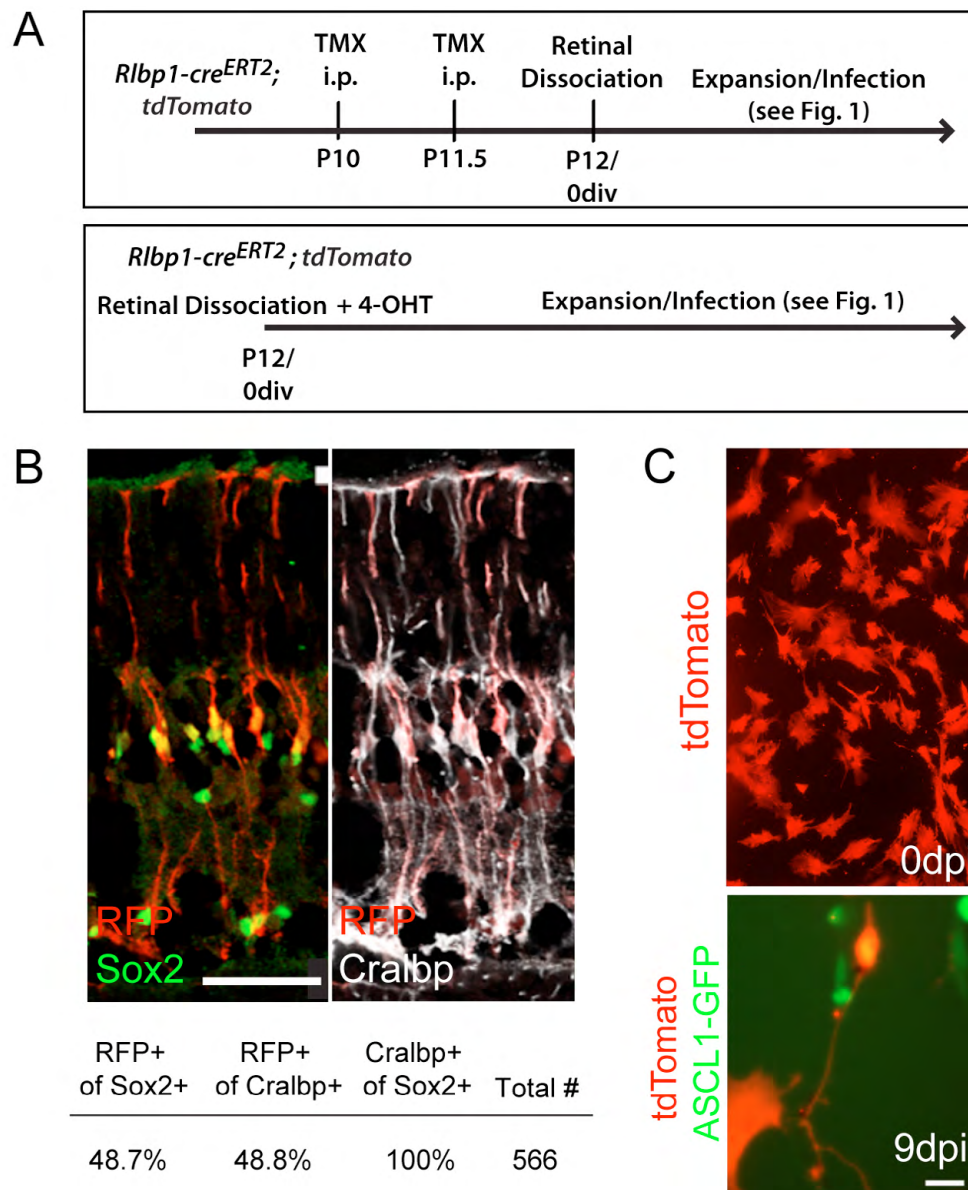

**Fig. S6. Genetic fate mapping of cells derived from *Rbp1-cre<sup>ERT2</sup>;tdTomato* P12 MG.** Related to Fig. 7. **(A)** Experimental diagram. *Rbp1-cre<sup>ERT2</sup>;R26-flox-stop-tdTomato* retinas express tdTomato in Cralbp<sup>+</sup> MG after tamoxifen (TMX) administration. Tamoxifen was injected at P10 and P11.5 or 4-hydroxy-tamoxifen (4-OHT) was added to MG cultures to drive cre into the nucleus. MG were grown and infected as described in Fig. 1. **(B)** RFP<sup>+</sup> cells in P12 *Rbp1-cre<sup>ERT2</sup>;tdTomato* retinal cryosections colabel with glial markers Sox2 and Cralbp. Approximately 50% of RFP<sup>+</sup> cells label with glial markers when TMX is administered *in vivo* (A, upper panel). **(C)** Dissociated P12 *Rbp1-cre<sup>ERT2</sup>;tdTomato* ASCL1-infected MG cultures. By 9 dpi, ASCL1-GFP+tdTomato<sup>+</sup> cells with a neuronal appearance are observable. Scale bars: 20 μm (C); 50 μm (B).

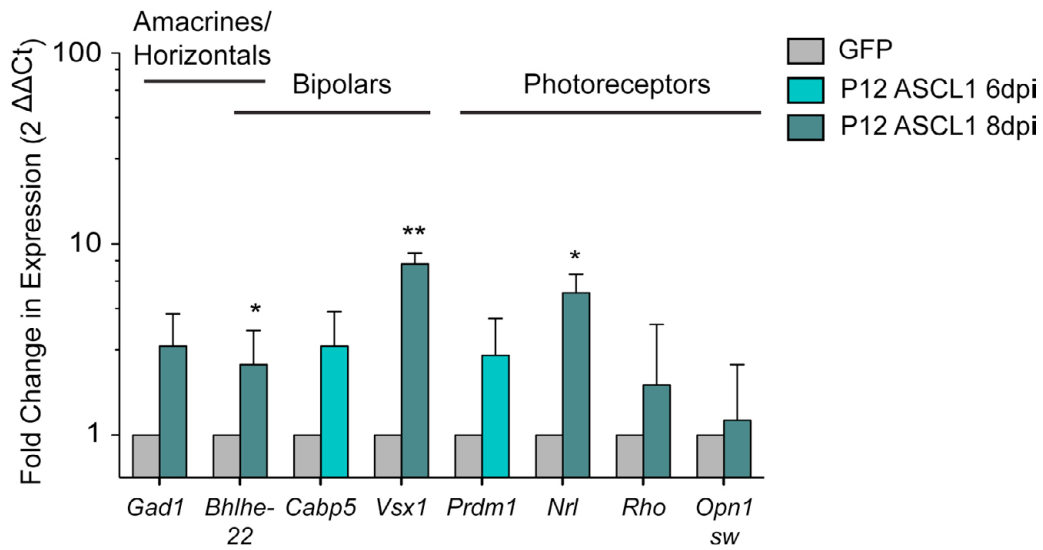

**Fig. S7. Expression of late retinal neuronal genes.** Related to Fig. 8. Genes specific to differentiated bipolar and amacrine cells are upregulated in P12 ASCL1-infected MG by qPCR. Data are mean  $\pm$  s.e.m. Student's *t*-test, \* $P < 0.05$ , \*\* $P < 0.01$ .

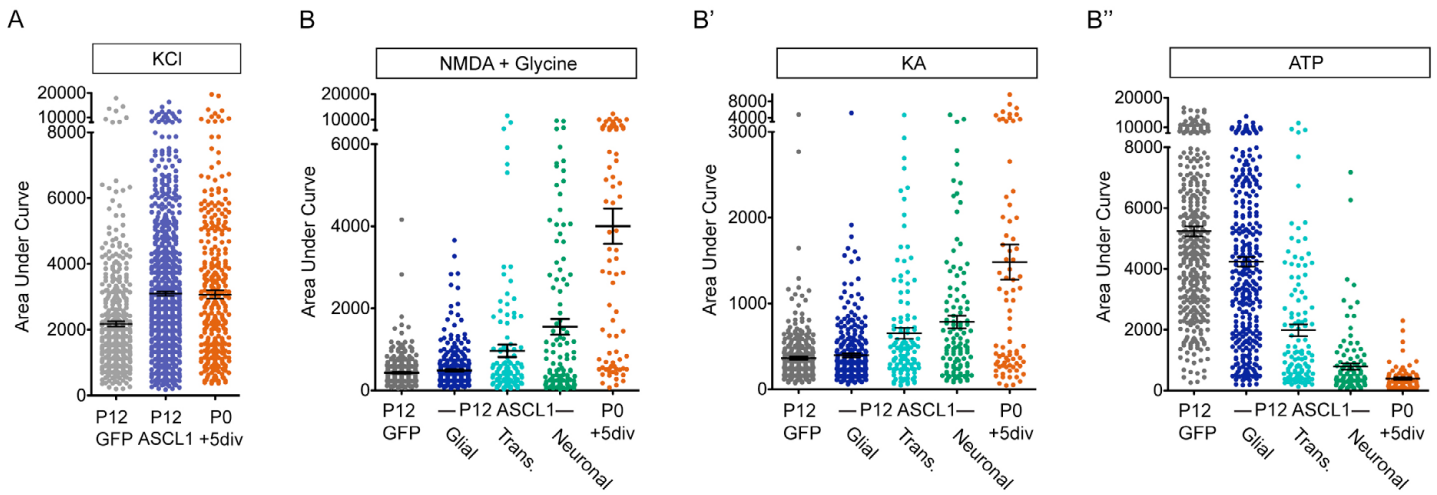

**Fig. S8. Morphology of ASCL1-infected MG is associated with calcium responsiveness.** Related to Fig. 9. (A)  $\Delta F_{340/380}$  responses to KCl application, as measured by area under the curve. (B-B'') Classification of ASCL1-infected MG from Fig. 9 by morphology (glial, transitional or neuronal). Neuronal- and transitional-like cells were more responsive to NMDA (B) and KA (B') and less responsive to ATP (B'') compared with cells with a glial appearance.

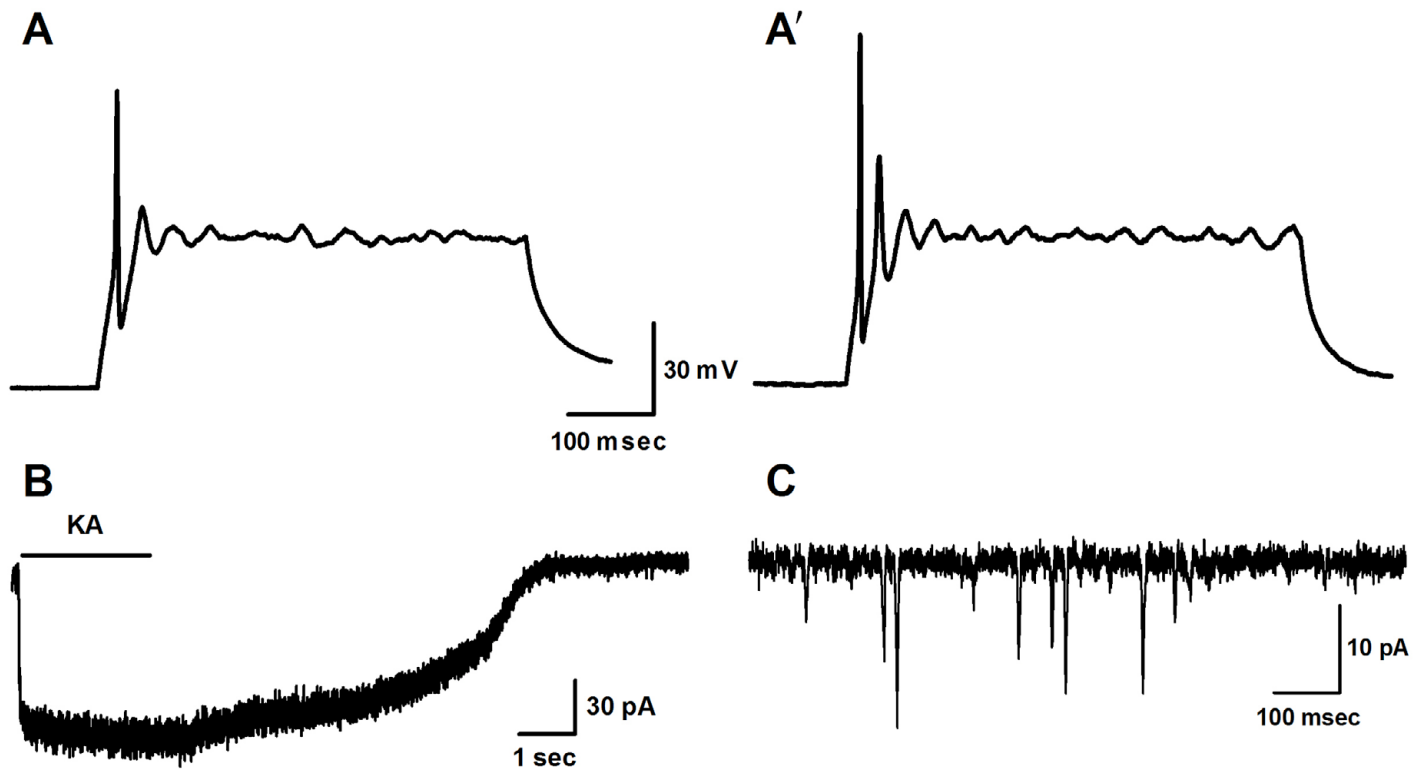

**Fig. S9. ASCL1-infected MG-derived cells have neuron-like electrophysiological responses.** Whole-cell patch clamp. (A,A') Current clamp recordings of action potentials evoked in two different ASCL1- GFP+ cells with neuronal morphology (15 dpi) in response to a 40 pA current step lasting 500 mseconds. (B) Voltage clamp recording of response (same cell as in A) to a 3-second application of 50 μm kainate (KA). (C) Voltage clamp recording of spontaneous miniature postsynaptic potentials in a third ASCL1- GFP+ cell (20 dpi) co-cultured for 18 days with retinal neurons dissociated from P0 animals.

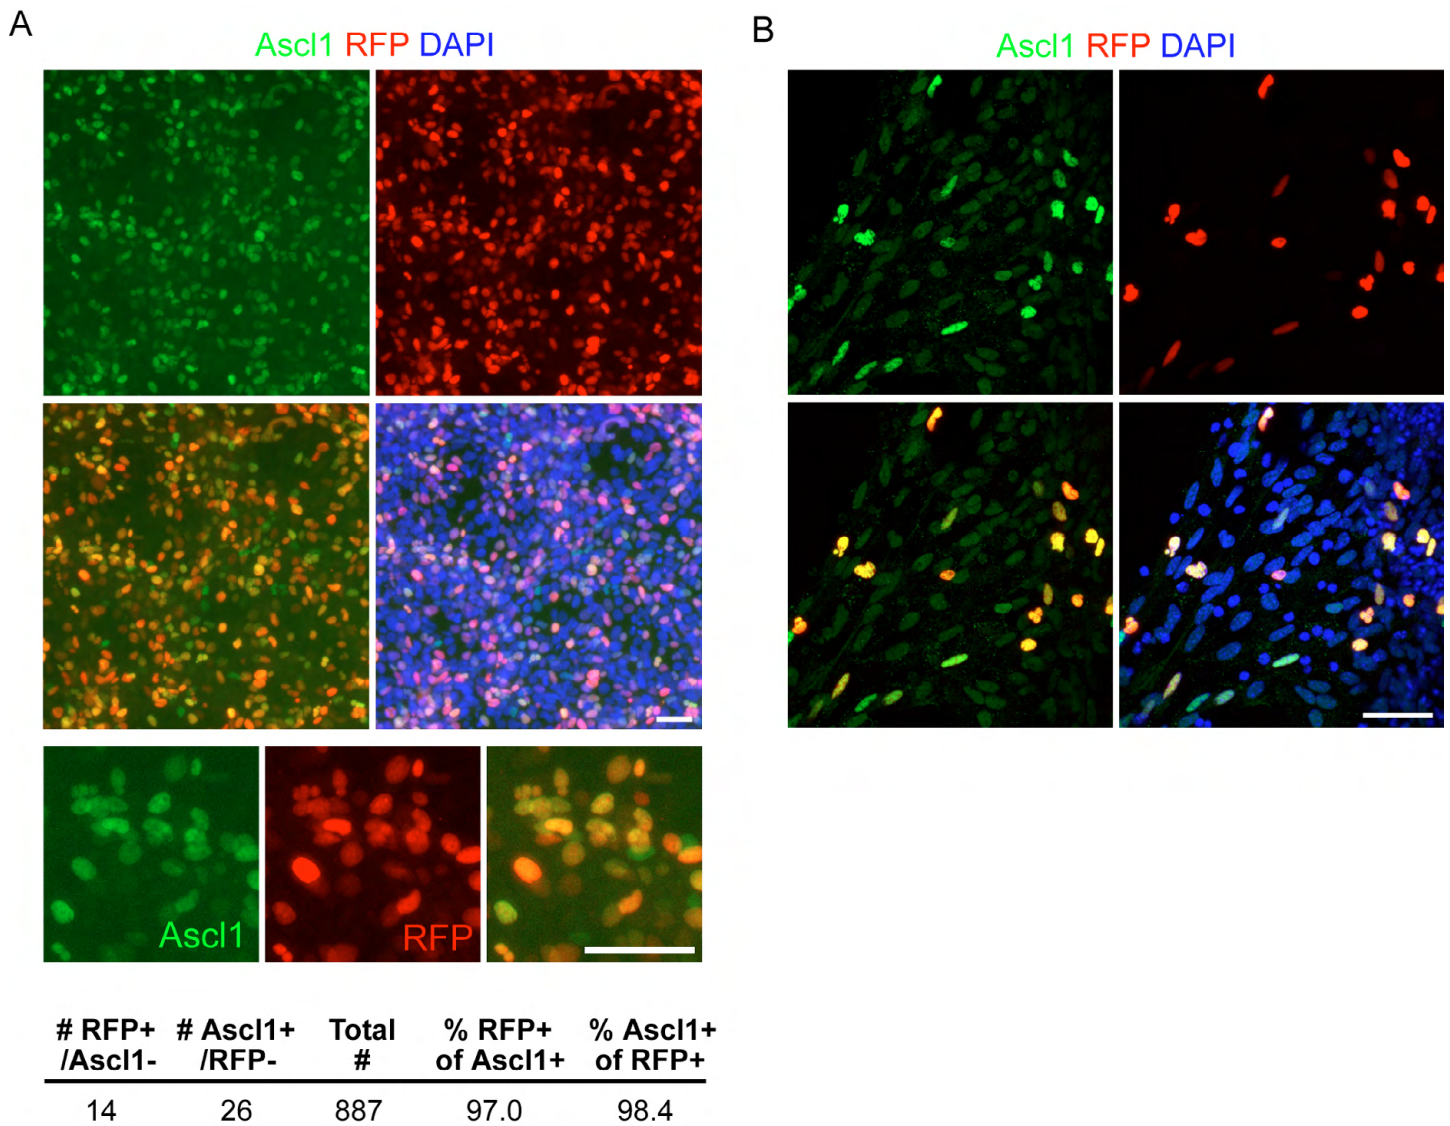

**Fig. S10. Validation of *tetO-hASCL1-IRES-mCherry* plasmid expression.** Related to Fig. 10. **(A)** Stable rtTA-expressing HEK293T cells were infected with *tetO-hASCL1-IRES-mCherry* lentiviral particles in the presence of 750 ng/ml doxycycline and fixed at 3 dpi. Ninety-seven percent of ASCL1+ cells immunolabeled for RFP and 98.4% of RFP+ cells labeled with Ascl1, indicating that mCherry/RFP can reliably be used as a marker for ASCL1 expression. **(B)** Ascl1 and mCherry markers colocalize in *aPax6-cre;R26-stop-flox-rtTA* P12 retinal explants infected with *tetO-hASCL1-IRES-mCherry*. Scale bars: 50  $\mu$ m (A); 100  $\mu$ m (B).



**Table S1. Primer sequences used for qPCR and ChIP analyses****qPCR primers**

| <b>Gene name</b>     | <b>F sequence (5' to 3')</b> | <b>R sequence (5' to 3')</b> |
|----------------------|------------------------------|------------------------------|
| <i>Actb</i>          | GGCTGTATTCCCCTCCATCG         | CCAGTTGGTAACAATGCCATGT       |
| <i>ASCL1</i> (human) | CATCTCCCCAACTACTCCA          | CAGTTGGTGAAGTCGAGAAGC        |
| <i>Atoh7</i>         | ATCACCCCTACCTCCCTTTCC        | CGAAGAGCCTCTGCCATA           |
| <i>Bhlhe22</i>       | TGAACGACGCTCTGGATGAG         | GGTTGAGGTAGGCGACTAAGC        |
| <i>Cabp5</i>         | ATGAGAACGATGGGTTACATGC       | CACGGCCACCAAGGTTTCATT        |
| <i>Cralbp</i>        | GGCACTTCCGCATGGTTC           | CCGGGTCTCCTCCTTTTCAT         |
| <i>Crx</i>           | TCTCTCACCTCAGCCCCTTAT        | ACCCACTGAAATAGGAACTTGGAA     |
| <i>Dll1</i>          | CAGGACCTTCTTTCGCGTATG        | AAGGGGAATCGGATGGGGTT         |
| <i>Dll4</i>          | TTCCAGGCAACCTTCTCCGA         | ACTGCCGCTATTCTTGTCCC         |
| <i>Fabp7</i>         | GGACACAATGCACATTCAAGAAC      | CCGAACCACAGACTTACAGTTT       |
| <i>Fgf15</i>         | TCACATGGACCCTGTTGTGT         | CAGCAGCCTCCAAAGTCAGT         |
| <i>Foxn4</i>         | CATGAAGGAGCACTTCCCCTA        | TTTCCGGCGGTCTGAGAT           |
| <i>Gad1</i>          | CACAGGTCACCCTCGATTTTT        | ACCATCCAACGATCTCTCTCATC      |
| <i>Gadd45g</i>       | GGGAAAGCACTGCACGAACT         | AGCACGCAAAGGTCACTTG          |
| <i>Hes5</i>          | AGTCCCAAGGAGAAAAACCGA        | GCTGTGTTTCAGGTAGCTGAC        |
| <i>Hes6</i>          | ACCACCTGCTAGAATCCATGC        | GCACCCGGTTTAGTTTCAGC         |
| <i>Heyl</i>          | CAGCCCTTCGCAGATGCAA          | CCAATCGTCGCAATTCAGAAAG       |
| <i>Hmgb3</i>         | AGGTGACCCCAAGAAACCAA         | GCAAATGACGGGAACCTCTG         |
| <i>Isl1</i>          | TATCCAGGGGATGACAGGAAC        | GCTGTTGGGTGTATCTGGGAG        |
| <i>Mfng</i>          | ATGCACTGCCGACTTTTTTCG        | CCTGGGTTCCGTTGGTTTCAG        |
| <i>Myb</i>           | GAGCACCCAACCTGTTCTCG         | CACCAGGGGCCTGTTCTTAG         |
| <i>Mycn</i>          | ACCATGCCGGGGATGATCT          | ATCTCCGTAGCCCAATTCGAG        |
| <i>Neurod1</i>       | ATGACCAAATCATAACAGCGAGAG     | TCTGCCTCGTGTTCCTCGT          |
| <i>Neurod4</i>       | AGCTGGTCAACACACAATCCT        | GTTCCGAGCATTCCATAAGAGC       |
| <i>Neurog2</i>       | AACTCCACGTCCCATAACAG         | GAGGCGCATAACGATGCTTC         |
| <i>Nrl</i>           | TCCAGTCCCTTGGCTATGG          | CACCGAGCTGTATGGTGTG          |
| <i>Olig2</i>         | GCTCACCAGTCGCTTCATCT         | GCGCGAACTACATCCTCAT          |
| <i>Opn1sw</i>        | CAGCATCCGCTTCAACTCCAA        | GCAGATGAGGGAAAGAGGAATGA      |
| <i>Opn2</i>          | CCCTTCTCCAACGTCACAGG         | TGAGGAAGTTGATGGGGAAGC        |
| <i>Otx2</i>          | TATCTAAAGCAACCGCCTTACG       | AAGTCCATACCCGAAGTGGTC        |
| <i>Prdm1</i>         | TTCTCTTGGAAAAACGTGTGGG       | GGAGCCGGAGCTAGACTTG          |
| <i>Prox1</i>         | AGAAGGGTTGACATTGGAGTGA       | TGCGTGTGACCACAGAATA          |
| <i>Sfrp2</i>         | CGTGGGCTCTTCTCTTCG           | ATGTTCTGGTACTCGATGCCG        |
| <i>Slc1a3</i>        | ACCAAAAGCAACGGAGAAGAG        | GGCATTCCGAAACAGGTAATC        |
| <i>Tubb3</i>         | TAGACCCAGCGGCAACTAT          | GTTCCAGGTTCCAAGTCCACC        |
| <i>Turbo-Gfp</i>     | GACCAAGACTGGGGAGATCA         | ACAGCCACAATGGTGTCAA          |
| <i>Vsx1</i>          | GAGGCACAGGACGGTTTTCA         | AGCTCTGTTTTTCGAGCCA          |

**ChIP primers**

| <b>Gene name</b>    | <b>F sequence (5' to 3')</b> | <b>R sequence (5' to 3')</b> |
|---------------------|------------------------------|------------------------------|
| <i>MyoD</i>         | GGCTTTTAGGCTACCCTGGAT        | TGGTGAAGAAAGCAGTCGTG         |
| <i>Hes5</i>         | TTCCCACAGCCCGGACATT          | GCGCACGCTAAATTGCCTGTGAAT     |
| <i>Dll1</i>         | AGCTCTTCTCTCCGATTG           | CTGTTATTGTGCGAGGCTGA         |
| <i>Hes6</i>         | CATGTCAATGCACCGATTGGC        | GCCTAAGTGGCAGGAGGTC          |
| <i>Dll3</i>         | TGCCCGAAGACTGAAGACTAATT      | TGGGCTCAGGAAGGTGTGA          |
| <i>Ascl1</i> 0.5 kb | GCCACTCCTCTGAAAGATGC         | TTTATTCCACACAGCCCACA         |
| <i>Ascl1</i> 1 kb   | CAGGGAAGGGTTTAGGCAGA         | CTCTCCCCTCCTACCTTCT          |

**Table S2. GO analysis of most highly regulated genes after Ascl1 infection of P12 MGs**

| GO term    | Description                                              | P-value  | FDRq-value | Enrichment |
|------------|----------------------------------------------------------|----------|------------|------------|
| GO:0007399 | nervous system development                               | 1.14E-15 | 1.29E-11   | 4.95       |
| GO:0060284 | regulation of cell development                           | 1.37E-14 | 7.71E-11   | 2.48       |
| GO:0045664 | regulation of neuron differentiation                     | 1.81E-14 | 6.81E-11   | 2.97       |
| GO:0050767 | regulation of neurogenesis                               | 3.41E-14 | 9.63E-11   | 2.76       |
| GO:0023051 | regulation of signaling                                  | 8.08E-14 | 1.82E-10   | 2.18       |
| GO:0050804 | regulation of synaptic transmission                      | 8.42E-14 | 1.58E-10   | 5.32       |
| GO:0051969 | regulation of transmission of nerve impulse              | 9.50E-14 | 1.53E-10   | 4.98       |
| GO:0010646 | regulation of cell communication                         | 9.96E-14 | 1.40E-10   | 2.17       |
| GO:0048731 | system development                                       | 1.08E-13 | 1.35E-10   | 3.29       |
| GO:0050793 | regulation of developmental process                      | 2.17E-13 | 2.45E-10   | 2.04       |
| GO:0051960 | regulation of nervous system development                 | 2.89E-13 | 2.97E-10   | 2.59       |
| GO:0071840 | cellular component organization or biogenesis            | 3.90E-13 | 3.67E-10   | 1.4        |
| GO:0048869 | cellular developmental process                           | 1.03E-12 | 8.97E-10   | 2.49       |
| GO:0007275 | multicellular organismal development                     | 1.26E-12 | 1.01E-09   | 2.98       |
| GO:0031644 | regulation of neurological system process                | 1.45E-12 | 1.09E-09   | 4.56       |
| GO:0051239 | regulation of multicellular organismal process           | 1.63E-12 | 1.15E-09   | 2.03       |
| GO:0032502 | developmental process                                    | 2.91E-12 | 1.93E-09   | 2.02       |
| GO:0016043 | cellular component organization                          | 3.94E-12 | 2.47E-09   | 1.39       |
| GO:0044708 | single-organism behavior                                 | 4.43E-12 | 2.63E-09   | 3.89       |
| GO:0045595 | regulation of cell differentiation                       | 5.65E-12 | 3.19E-09   | 2.19       |
| GO:0042391 | regulation of membrane potential                         | 5.89E-11 | 3.17E-08   | 3.01       |
| GO:0007610 | behavior                                                 | 8.25E-11 | 4.23E-08   | 3.42       |
| GO:0022402 | cell cycle process                                       | 1.94E-10 | 9.51E-08   | 1.85       |
| GO:0048856 | anatomical structure development                         | 2.82E-10 | 1.33E-07   | 1.92       |
| GO:2000026 | regulation of multicellular organismal development       | 4.78E-10 | 2.16E-07   | 2          |
| GO:0044057 | regulation of system process                             | 5.54E-10 | 2.41E-07   | 3.11       |
| GO:0007219 | Notch signaling pathway                                  | 7.24E-10 | 3.03E-07   | 14.14      |
| GO:0048522 | positive regulation of cellular process                  | 8.41E-10 | 3.39E-07   | 1.57       |
| GO:0030154 | cell differentiation                                     | 1.34E-09 | 5.23E-07   | 2.41       |
| GO:0007268 | synaptic transmission                                    | 1.36E-09 | 5.11E-07   | 4.08       |
| GO:0050806 | positive regulation of synaptic transmission             | 5.72E-09 | 2.08E-06   | 8.07       |
| GO:0031646 | positive regulation of neurological system process       | 5.85E-09 | 2.06E-06   | 7.44       |
| GO:0048646 | anatomical structure formation involved in morphogenesis | 6.14E-09 | 2.10E-06   | 3.27       |
| GO:0051128 | regulation of cellular component organization            | 6.88E-09 | 2.28E-06   | 1.54       |
| GO:0044767 | single-organism developmental process                    | 1.17E-08 | 3.76E-06   | 1.96       |
| GO:0007049 | cell cycle                                               | 1.34E-08 | 4.20E-06   | 1.8        |
| GO:0051971 | positive regulation of transmission of nerve impulse     | 1.36E-08 | 4.14E-06   | 7.63       |
| GO:0048518 | positive regulation of biological process                | 1.67E-08 | 4.97E-06   | 1.61       |
| GO:0006260 | DNA replication                                          | 1.72E-08 | 4.99E-06   | 2.7        |
